# Supplementary material for: MicroRNA-34a/IL-6R pathway as a potential therapeutic target for ovarian high-grade serous carcinoma
Source: PubMed Central journal article supplement (PMC6690672; doi:10.18632/oncotarget.27117), 2019-08-06
Supplement: oncotarget-10-4880-s001.pdf [file oncotarget-10-4880-s001.pdf]

## **MicroRNA-34a/IL-6R pathway as a potential therapeutic target for ovarian high-grade serous carcinoma**

### **SUPPLEMENTARY MATERIALS**

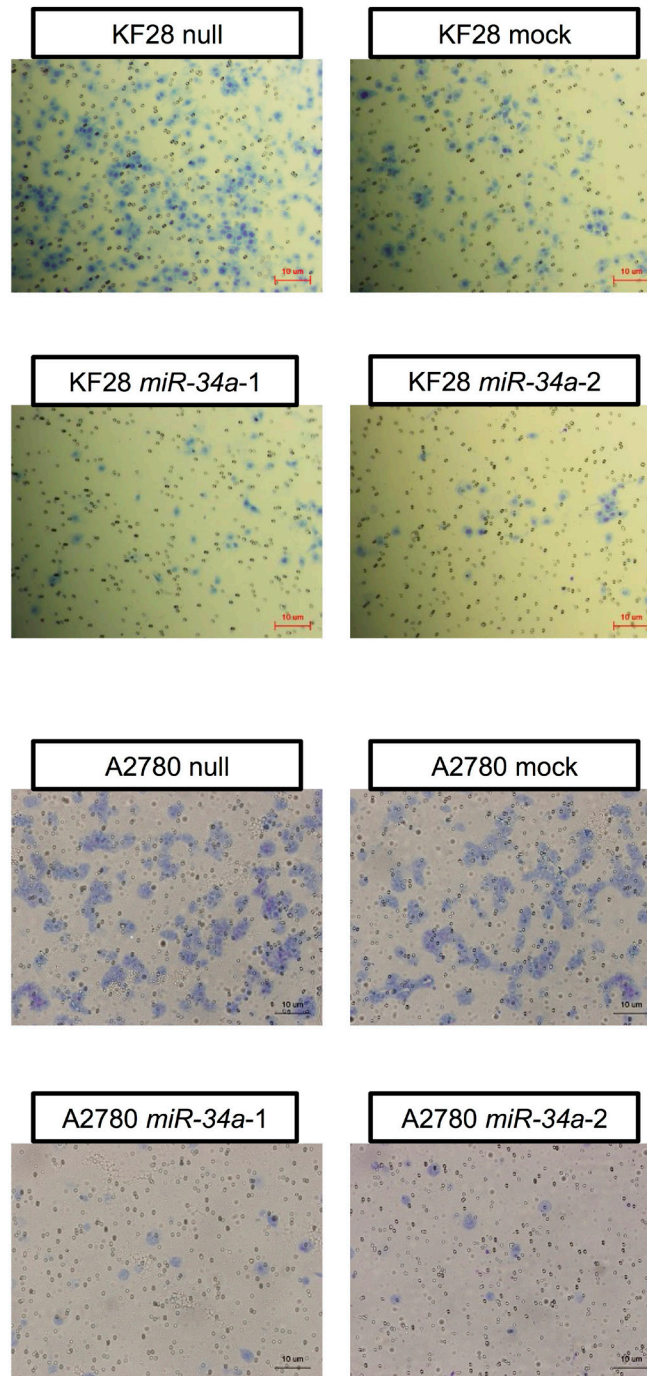

**Supplementary Figure 1: Representative images of the invasion assay.** Representative images of the invasion assay showing that HGSC cell lines with *miR-34a* overexpression had reduced cell invasion ability compared with negative control cells.

A

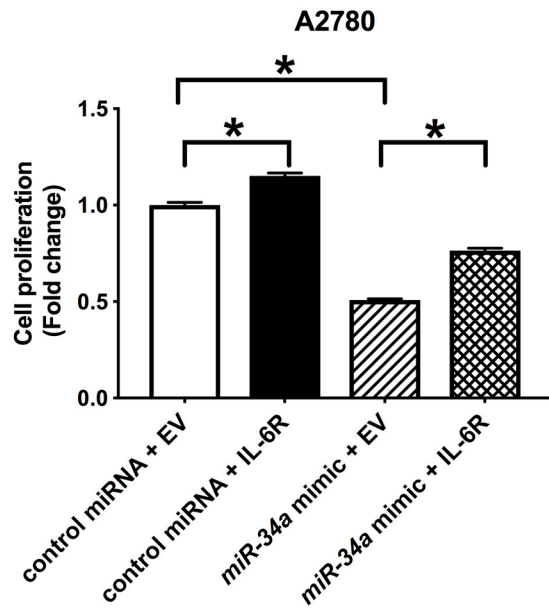

B

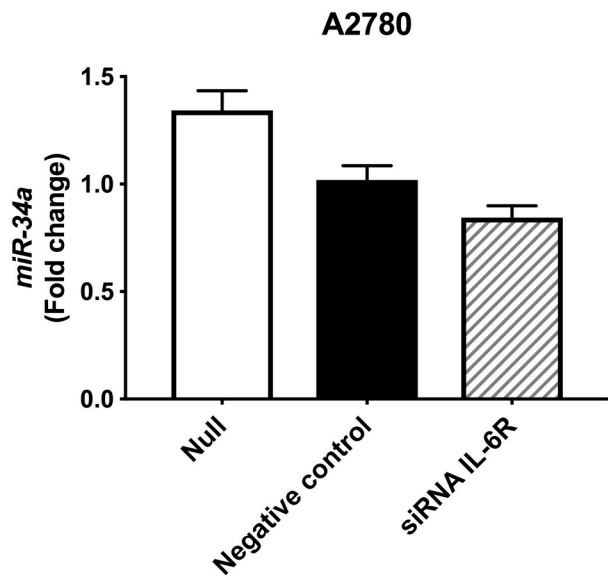

**Supplementary Figure 2: Correlation between IL-6R and *miR-34a* in A2780.** (A) Restored IL-6R expression partially recovered the cell proliferation ability suppressed by *miR-34a* mimic. (B) *miR-34a* expression was quantified using the comparative method in real-time RT-PCR analysis. IL-6R downregulation with siRNA transfection did not induce *miR-34a* expression.

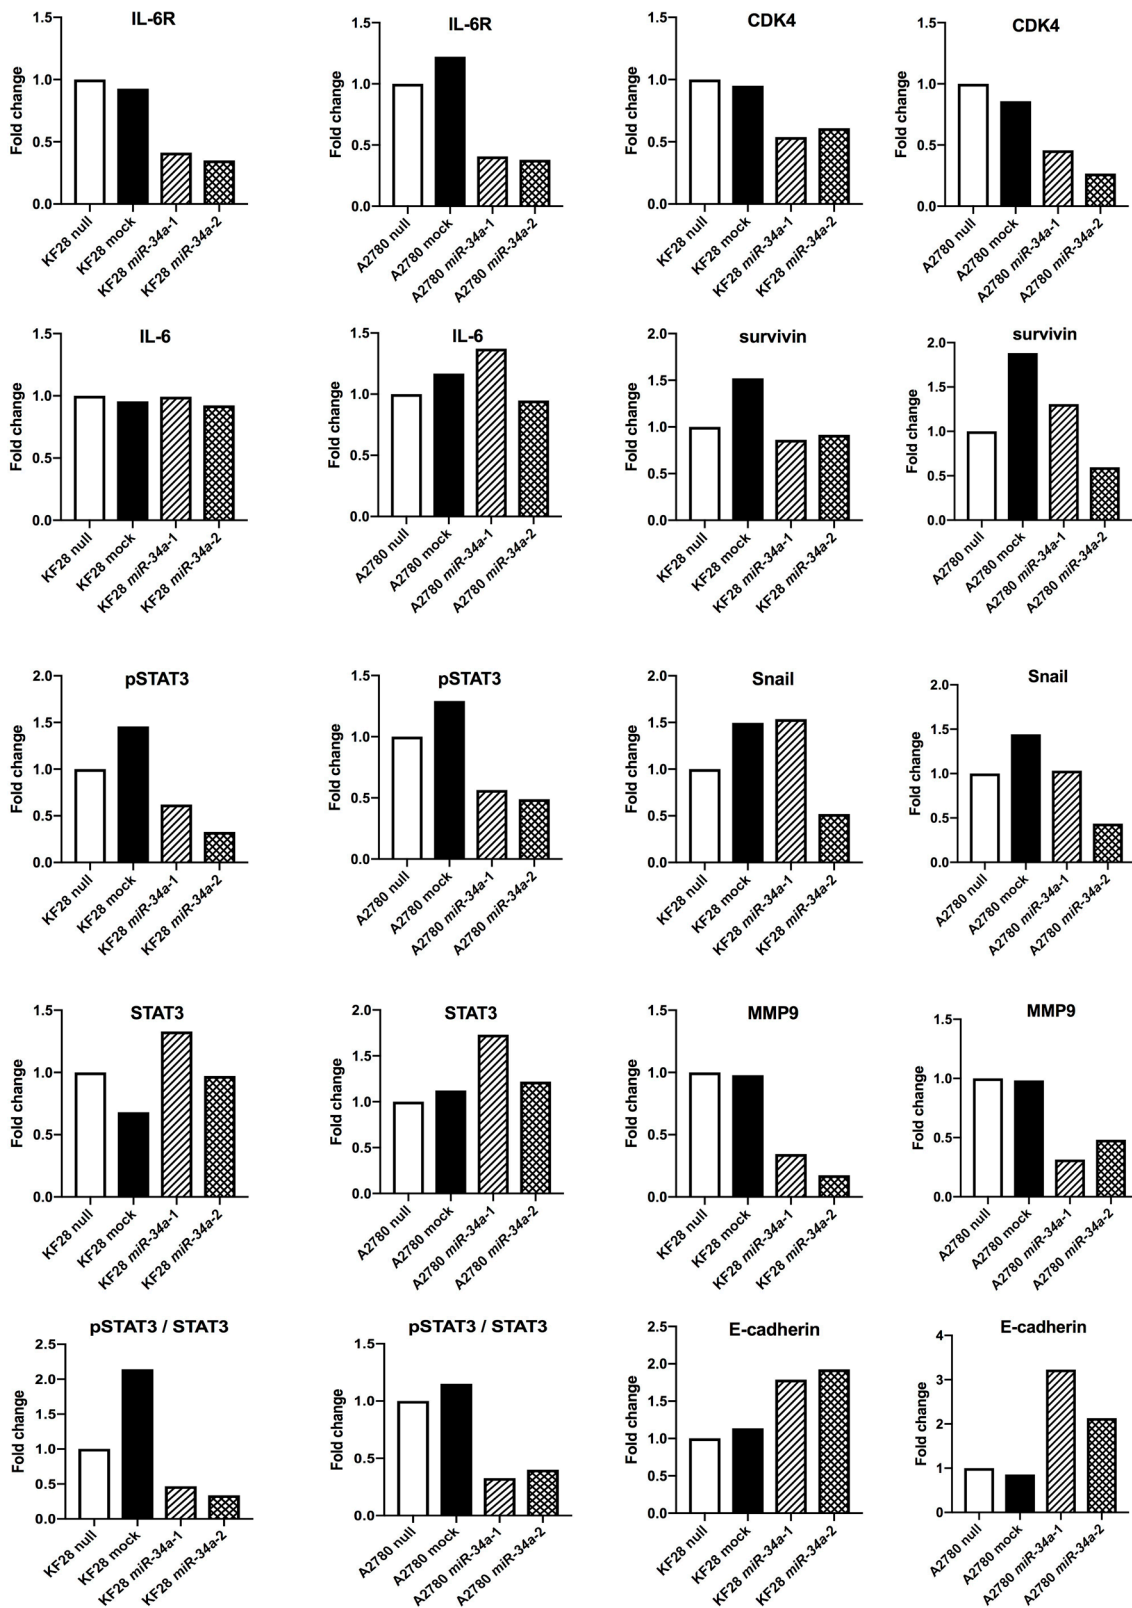

**Supplementary Figure 3: Densitometric analysis of Western blot analysis.** Protein bands demonstrated in Figure 2D were quantified with densitometric analysis. Each band normalized to corresponding  $\beta$ -Actin was indicated. The ratio of pSTAT3 to STAT3 was also indicated.

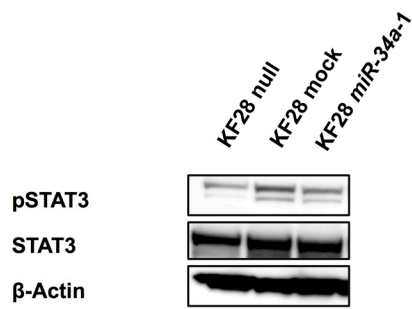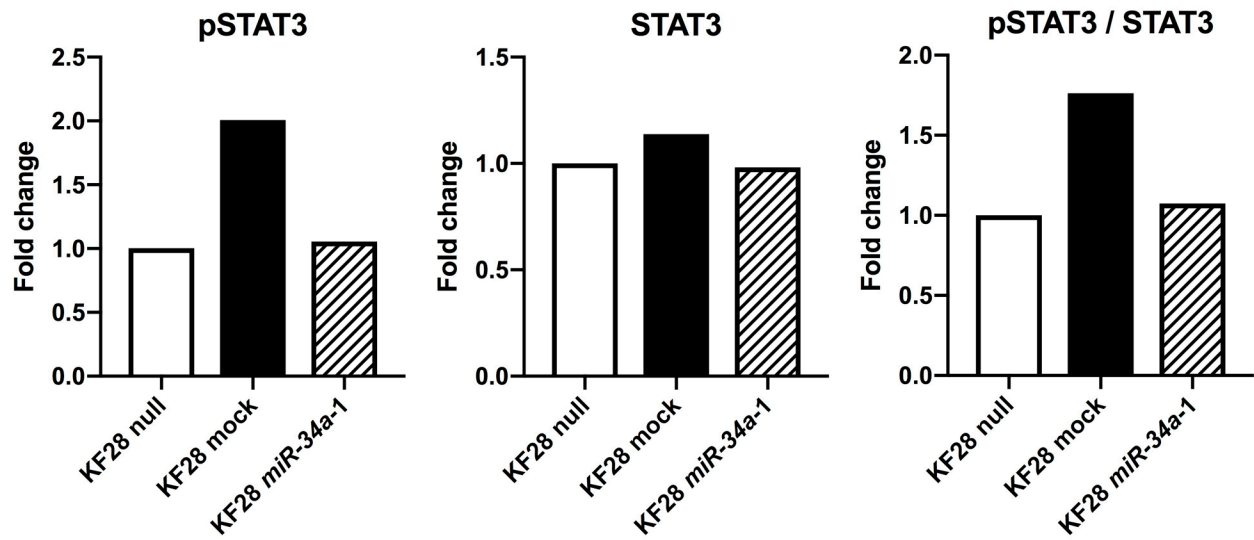

**Supplementary Figure 4: Expressions of pSTAT3 and STAT3 in the tumors obtained from *in vivo* experiments.** Expression of pSTAT3 and STAT3 in the tumors were analyzed using Western blot analysis.  $\beta$ -actin was used as loading control. Protein bands were quantified with densitometric analysis. Each band normalized to corresponding  $\beta$ -Actin was indicated. The ratio of pSTAT3 to STAT3 was also indicated.

**Supplementary Table 1: Patient characteristics associated with *miR-34a*, IL-6R, copy number of 1p36.22, and methylation of the *miR-34a* promoter region**

| Patient | Age (years) | FIGO stage | Residual tumorR ≠ 0: +R = 0: - | Relative <i>miR-34a</i> expression | IL-6RIHC score | Copy number of 1p36.22 loss: +normal or amplification: - | PMR (%): - |
|---------|-------------|------------|--------------------------------|------------------------------------|----------------|----------------------------------------------------------|------------|
| 1       | 51          | III        | +                              | 3.73                               | 5              | -                                                        | 5.75       |
| 2       | 60          | III        | -                              | 1.25                               | 2              | -                                                        | 19.62      |
| 3       | 61          | III        | -                              | 4.28                               | 2              | -                                                        | 2.43       |
| 4       | 49          | IV         | +                              | 0.40                               | 6              | +                                                        | 0.58       |
| 5       | 65          | III        | +                              | 0.14                               | 5              | -                                                        | 30.88      |
| 6       | 60          | IV         | +                              | 0.75                               | 2              | -                                                        | -          |
| 7       | 69          | III        | -                              | 0.82                               | 2              | -                                                        | 4.31       |
| 8       | 55          | III        | -                              | 0.59                               | 4              | +                                                        | 8.21       |
| 9       | 40          | III        | +                              | 1.36                               | 0              | -                                                        | -          |
| 10      | 63          | III        | +                              | 0.80                               | 6              | -                                                        | -          |
| 11      | 52          | III        | -                              | 0.46                               | 2              | UD                                                       | -          |
| 12      | 66          | III        | +                              | 0.04                               | 6              | -                                                        | 23.97      |
| 13      | 47          | III        | -                              | 0.12                               | 4              | -                                                        | 7.65       |
| 14      | 53          | III        | +                              | 0.22                               | 5              | -                                                        | 13.97      |
| 15      | 56          | III        | +                              | 0.12                               | 4              | -                                                        | 1.02       |
| 16      | 53          | III        | +                              | 0.14                               | 4              | -                                                        | 5.75       |
| 17      | 63          | III        | -                              | 0.12                               | 3              | -                                                        | 5.05       |
| 18      | 51          | III        | +                              | 0.26                               | 4              | -                                                        | 9.14       |
| 19      | 59          | III        | +                              | 1.00                               | 6              | +                                                        | -          |
| 20      | 44          | III        | -                              | 1.39                               | 5              | +                                                        | 3.42       |
| 21      | 64          | II         | -                              | 1.86                               | 5              | -                                                        | -          |
| 22      | 53          | I          | -                              | 20.96                              | 4              | -                                                        | 2.05       |
| 23      | 53          | I          | -                              | 0.30                               | 5              | +                                                        | 37.47      |
| 24      | 57          | I          | -                              | 4.23                               | 6              | UD                                                       | -          |
| 25      | 45          | I          | -                              | 0.90                               | 3              | -                                                        | 22.19      |
| 26      | 42          | II         | -                              | 2.98                               | 4              | -                                                        | 4.32       |
| 27      | 44          | II         | -                              | 7.04                               | 2              | -                                                        | 12.42      |
| 28      | 67          | III        | -                              | 8.69                               | 2              | -                                                        | 1.30       |
| 29      | 52          | III        | -                              | 1.22                               | 0              | +                                                        | 18.72      |
| 30      | 48          | III        | +                              | 1.71                               | 2              | +                                                        | 3.33       |
| 31      | 54          | II         | -                              | 9.59                               | 5              | -                                                        | 44.26      |
| 32      | 68          | III        | -                              | 2.27                               | 4              | +                                                        | -          |
| 33      | 58          | III        | +                              | 1.42                               | 4              | +                                                        | 7.86       |

Relative *miR-34a* expression was normalized with the median. Copy number change could not be determined in two patients. FIGO, International Federation of Gynecology and Obstetrics; IHC, immunohistochemistry; UD, undetermined; PMR, percentage of fully methylated reference.

**Supplementary Table 2: Primer list**

---

|                            |                |                                             |
|----------------------------|----------------|---------------------------------------------|
| <i>IL-6R</i>               | Forward Primer | 5'-GTG CGT CGC CAG TAG TGT-3'               |
|                            | Reverse Primer | 5'-TCA GGC TGC AAG ATT CCA CAA C-3'         |
| <i>GAPDH</i>               | Forward Primer | 5'-GAC AGT CAG CCG CAT CTT CTT T-3'         |
|                            | Reverse Primer | 5'-ACC AGA GTT AAA AGC AGC CCT-3'           |
| Promoter of <i>miR-34a</i> | Forward Primer | 5'-CCG CGC GAT CCG AAT-3'                   |
|                            | Reverse Primer | 5'-GGA TGA GGA TTA GGA TTT CGT GTT-3'       |
| <i>COL2A1</i>              | Forward Primer | 5'-TCT AAC AAT TAT AAA CTC CAA CCA CCA A-3' |
|                            | Reverse Primer | 5'-GGG AAG ATG GGA TAG AAG GGA ATA T-3'     |

---
